# Supplementary material for: A Novel, Easy Assay Method for Human Cysteine Sulfinic Acid Decarboxylase
Source: MDPI journal article supplement (doi:10.3390/life11050438), 2021-05-14
Supplement: s1 [file s1]

## Supplementary Materials

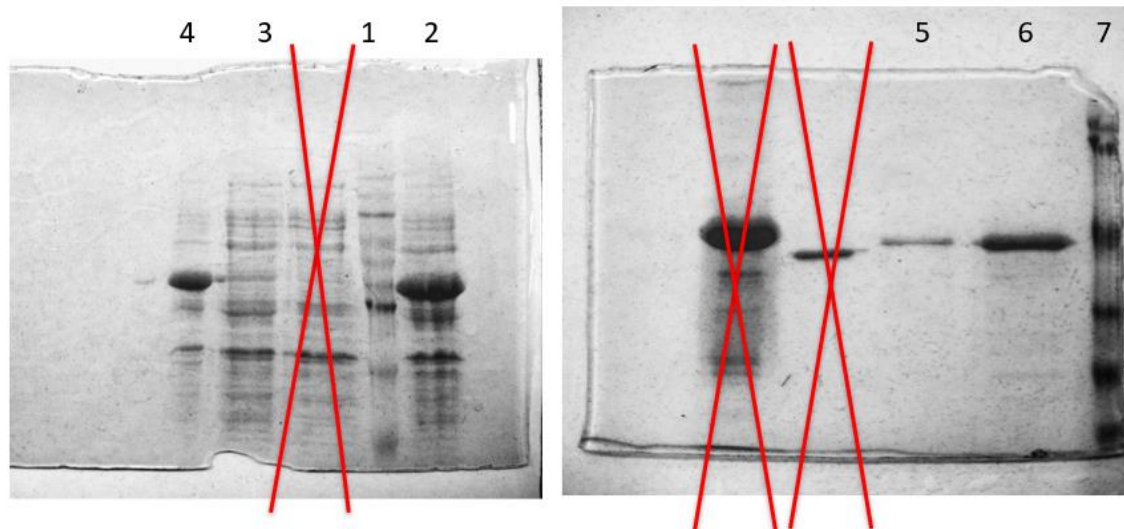

**Figure S1.** SDS-PAGE gels. Lane numbering shown in these figures is the same shown in Figure 2a. The lanes that are not part of Figure 2a are red-crossed.
